# Supplementary material for: Intragastric Safflower Yellow Alleviates HFD Induced Metabolic Dysfunction-Associated Fatty Liver Disease in Mice through Regulating Gut Microbiota and Liver Endoplasmic Reticulum Stress
Source: MDPI journal article supplement (doi:10.3390/nu15132954), 2023-06-29
Supplement: s1 [file s1]

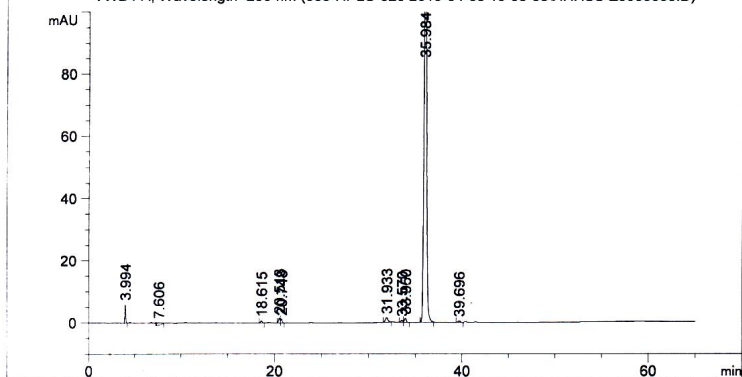

=====  
 Area Percent Report  
 =====

Sorted By : Signal  
 Multiplier : 1.0000  
 Dilution : 1.0000  
 Do not use Multiplier & Dilution Factor with ISTDs

Signal 1: VWD1 A, Wavelength=230 nm

| Peak # | RetTime [min] | Type | Width [min] | Area [mAU*s] | Height [mAU] | Area %  |
|--------|---------------|------|-------------|--------------|--------------|---------|
| 1      | 3.994         | BB   | 0.1031      | 39.64480     | 6.00055      | 1.3458  |
| 2      | 7.606         | VB   | 0.3743      | 25.76117     | 8.65319e-1   | 0.8745  |
| 3      | 18.615        | BB   | 0.1879      | 8.39716      | 6.95199e-1   | 0.2851  |
| 4      | 20.513        | BV   | 0.1746      | 18.45795     | 1.59946      | 0.6266  |
| 5      | 20.748        | VB   | 0.1677      | 13.08910     | 1.19625      | 0.4443  |
| 6      | 31.933        | BB   | 0.2968      | 29.29592     | 1.48116      | 0.9945  |
| 7      | 33.570        | BV   | 0.2201      | 8.88366      | 6.24065e-1   | 0.3016  |
| 8      | 33.950        | VB   | 0.2261      | 18.34034     | 1.25803      | 0.6226  |
| 9      | 35.984        | BB   | 0.2722      | 2776.21973   | 157.05194    | 94.2439 |
| 10     | 39.696        | BB   | 0.2449      | 7.69147      | 4.96104e-1   | 0.2611  |

Totals : 2945.78130 171.26807
