# Supplementary material for: Intragastric Safflower Yellow Alleviates HFD Induced Metabolic Dysfunction-Associated Fatty Liver Disease in Mice through Regulating Gut Microbiota and Liver Endoplasmic Reticulum Stress
Source: MDPI journal article supplement (doi:10.3390/nu15132954), 2023-06-29
Supplement: s1 [file s1]

**Table S1: Primers for RT-qPCR**

| Gene             | Forward primer          | Reverse primer          |
|------------------|-------------------------|-------------------------|
| m- <i>Fasn</i>   | GGAGGTGGTGATAGCCGGTAT   | TGGGTAATCCATAGAGCCCAG   |
| m- <i>Acc</i>    | GATGAACCATCTCCGTTGGC    | GACCCAATTATGAATCGGGAGTG |
| m- <i>Srebp1</i> | TGACCCGGCTATTCCGTGA     | CTGGGCTGAGCAATACAGTTC   |
| m- <i>Ppia</i>   | GCTGGACCAAACACAAACGG    | TCCTGGACCCAAAACGCTC     |
| m- <i>Scd1</i>   | TTCTTGCGATACACTCTGGTGC  | CGGGATTGAATGTTCTTGTCGT  |
| m- <i>Hspa5</i>  | ACTTGGGGACCACCTATTCCT   | ATCGCCAATCAGACGCTCC     |
| m- <i>Xbp1s</i>  | ACGAGGTTCCAGAGGTGGAG    | TGTCCAGAATGCCCAAAAGG    |
| m- <i>Ppara</i>  | AGAGCCCCATCTGTCCTCTC    | ACTGGTAGTCTGCAAAACCAAA  |
| m- <i>Cpt1a</i>  | AACAACGGCAGAGCAGAG      | CCACATAGAGGCAGAAGAGG    |
| m- <i>Atf4</i>   | ATGGCGCTCTTCACGAAATC    | ACTGGTCGAAGGGGTCATCAA   |
| m- <i>Atf6</i>   | GACTCACCCATCCGAGTTGTG   | CTCCCAGTCTTCATCTGGTCC   |
| m- <i>Ddit3</i>  | CTGGAAGCCTGGTATGAGGAT   | CAGGGTCAAGAGTAGTGAAGGT  |
| m- <i>Xbp1</i>   | AGCAGCAAGTGGTGGATTTG    | GAGTTTTCTCCCGTAAAAGCTGA |
| m- <i>Tnf</i>    | TAGCCAGGAGGGAGAACAGA    | TTTTCTGGAGGGAGATGTGG    |
| m- <i>Il1b</i>   | TTGAAGAAGAGCCCATCCTC    | CAGCTCATATGGGTCCGAC     |
| h- <i>SREBP1</i> | ACAGTGACTTCCCTGGCCTAT   | GCATGGACGGGTACATCTTCAA  |
| h- <i>ACC</i>    | GATGAACCATCTCCGTTGGC    | GACCCAATTATGAATCGGGAGTG |
| h- <i>SCD1</i>   | TCTAGCTCCTATACCACCACCA  | TCGTCTCCAATTATCTCCTCC   |
| h- <i>FASN</i>   | GGAGGTGGTGATAGCCGGTAT   | TGGGTAATCCATAGAGCCCAG   |
| h- <i>TNF</i>    | CCTCTCTCTAATCAGCCCTCTG  | GAGGACCTGGGAGTAGATGAG   |
| h- <i>IL1b</i>   | ATGATGGCTTATTACAGTGCGAA | GTCGGAGATTTCGTAGCTGGA   |
| h- <i>PPARA</i>  | CCAGTATTTAGGAAGCTGTCCTG | CGTTGTGTGACATCCCGACAG   |
| h- <i>CPT1A</i>  | TCCAGTTGGCTTATCGTGGTG   | TCCAGAGTCCGATTGATTTTTGC |
| h- <i>ATF4</i>   | TCGACTTGGATGCCCTGTTG    | GGGAGATGGCCAATTGGGTT    |
| h- <i>ATF6</i>   | GTCAGCACCATCCCTGAGTC    | CTCTTCAGTCTGGCAGGGTC    |
| h- <i>DDIT3</i>  | GGAAACAGAGTGGTCA TTCCC  | CTGCTTGAGCCGTTCA TTCTC  |
| h- <i>XPB1</i>   | CCCTCCAGAACA TCTCCCCAT  | ACA TGA CTGGGTCCAAGTTGT |

h-*GAPDH*

ACAAC TTTGGTATCGTGGAAGG

GCCATCACGCCACAGTTTC

---

m: mouse, h: human
