# Supplementary material for: Intragastric Safflower Yellow Alleviates HFD Induced Metabolic Dysfunction-Associated Fatty Liver Disease in Mice through Regulating Gut Microbiota and Liver Endoplasmic Reticulum Stress
Source: MDPI journal article supplement (doi:10.3390/nu15132954), 2023-06-29
Supplement: s1 [file s1]

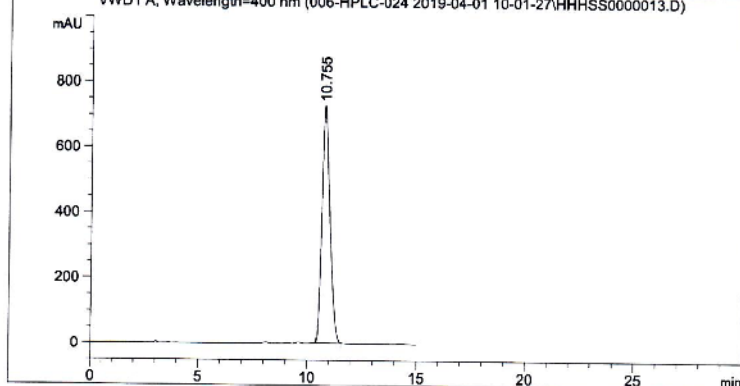=====  
Area Percent Report  
=====

Sorted By : Signal

Multiplier : 1.0000

Dilution : 1.0000

Do not use Multiplier &amp; Dilution Factor with ISTDs

Signal 1: VWD1 A, Wavelength=400 nm

| Peak # | RetTime [min] | Type | Width [min] | Area [mAU*s] | Height [mAU] | Area %   |
|--------|---------------|------|-------------|--------------|--------------|----------|
| 1      | 10.755        | BB   | 0.3720      | 1.84861e4    | 728.63824    | 100.0000 |

Totals : 1.84861e4 728.63824
