# Supplementary figures and images for: Intragastric Safflower Yellow Alleviates HFD Induced Metabolic Dysfunction-Associated Fatty Liver Disease in Mice through Regulating Gut Microbiota and Liver Endoplasmic Reticulum Stress
Source: MDPI journal article supplement (doi:10.3390/nu15132954), 2023-06-29

**A**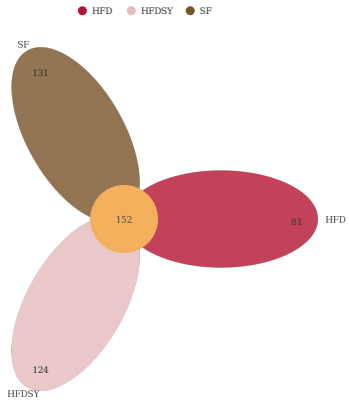**B**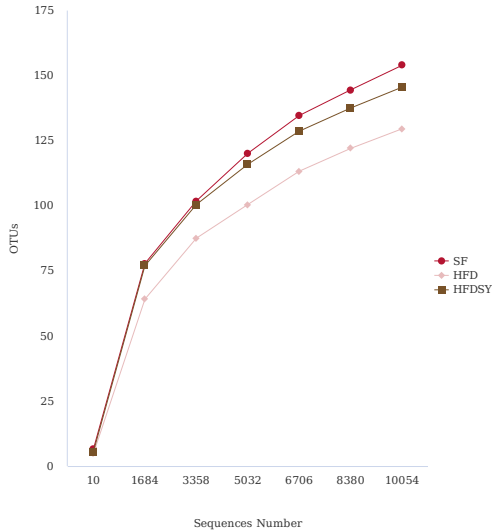

Supplement: s1 [file s1]

Cell viability (%)

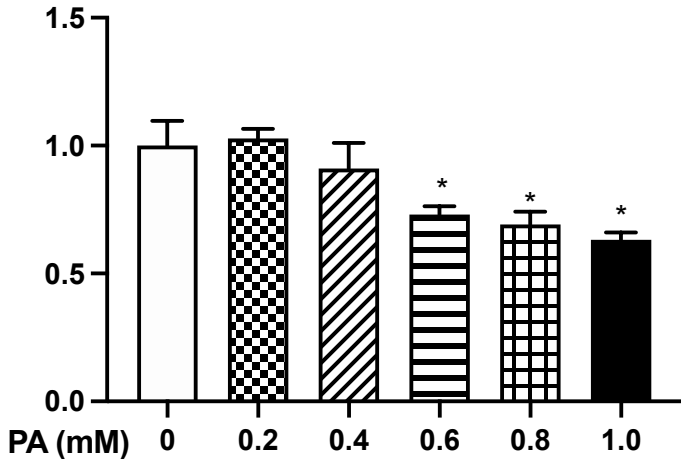

Supplement: s1 [file s1]
